# Supplementary material
Source: PubMed Central journal article supplement (PMC3384143)
Supplement: 1118979109_pnas.201118979SI.pdf [file 1118979109_pnas.201118979SI.pdf]

# Supporting Information

Li et al. 10.1073/pnas.1118979109

## SI Materials and Methods

**Patients and Vaccines.** All studies were approved by the Emory University institutional review board (IRB no. 03027 and 555-2000). Clinical information is detailed in Table S1. Twenty-four healthy adult volunteers were vaccinated with the monovalent pandemic (H1N1) 2009 vaccine. Twenty-two had been previously vaccinated with the 2009/10 seasonal TIV 4–160 d before receiving the pandemic (H1N1) 2009 vaccine. Subject 2, who was given the seasonal 2009/10 TIV only 4 d before receiving pandemic (H1N1) 2009 vaccine, was excluded from all cross-reactivity assays due to concerns about the generation of plasmablasts against the three seasonal strains (including H1N1 Brisbane/59/07), which would confound our data. Data obtained from 2008/09 and 2009/10 season TIV vaccine studies were used for comparison. All vaccines were obtained from Sanofi Pasteur. PBMCs were isolated, washed, and resuspended in RPMI with 10% (vol/vol) FCS for immediate use or frozen for subsequent analysis. Plasma samples were saved at  $-80^{\circ}\text{C}$  for subsequent analysis.

**Viruses and Antigens.** The pandemic (H1N1) 2009 influenza virus (A/California/04/09) was provided by R. J. Webby (St. Jude Children's Hospital). Other influenza virus stocks used for the assays were obtained from the Centers for Disease Control (CDC) and freshly grown in eggs, prepared, and purified as described (1). They included the following: A/Fort Monmouth/1/47 (H1N1), A/New Jersey/11/76, A/New Caledonia/20/99 (H1N1), A/Solomon Island/3/06, A/Brisbane/59/07 (H1N1), and A/Brisbane/10/07 (H3N2). Recombinant HA proteins were provided by the influenza reagent resource ([www.influenzareagentresource.org](http://www.influenzareagentresource.org)) of the CDC [recombinant HA from A/California/04/2009 (H1N1; #FR-180), A/Brisbane/10/2007 (H1N1; #FR-61), A/Brisbane/59/2007 (H3N2; #FR-65)] or by Biodefense and Emerging Infections research repository [[www.beiresources.org](http://www.beiresources.org); recombinant HA from A/Indonesia/05/2005 (H5N1)]. A/Brevig Mission/1/1918 (H1N1) was obtained from the CDC.

**ELISPOT and Memory B-Cell Assay.** Direct ELISPOT to enumerate the number of either total IgG-secreting, pandemic H1N1 influenza-virus-specific, vaccine-specific, and recombinant HA-specific plasmablasts present in the PBMC samples was performed as described (2). In brief, 96-well ELISPOT filter plates (Millipore) were coated overnight purified influenza virions, recombinant HAs, the 08/09 influenza vaccine diluted 1/20 in PBS, or goat anti-human Ig (Invitrogen). Plates were washed and blocked; then, antibody-secreting cells were detected with biotinylated anti-human IgG, IgM, or IgA antibody (Invitrogen) followed by avidin-D-HRP conjugate (Vector Laboratories) and then developed using AEC substrate (3-amino-9-ethyl-carbazole; Sigma-Aldrich). Memory cells were detected, as described (3), by incubating PBMCs at  $5 \times 10^5$  cells per mL in R-10 supplemented with pokeweed mitogen extract (PWM), phosphothiolated CpG ODN-200626, and *Staphylococcus aureus* Cowan (SAC) (Sigma) for 6 d; total and virus-specific IgG-secreting plasmablasts were quantified by ELISPOT assay.

**Flow Cytometry Analysis and Cell Sorting.** Analytical flow cytometry analysis was performed after fixing in 2% (vol/vol) PFA. Cell sorting on purified PBMCs used either a FACSVantage or ARIAII cell sorter and analysis by FlowJo. Antibodies used include: anti-CD27 (eBioscience) and anti-CD3-PECy7 or PerCP, anti-CD20-PECy7 or PerCP, anti-CD38-PE, anti-CD27-APC, and anti-CD19-FITC (BD). Antibody-secreting cells (ASCs) were gated and isolated as  $\text{CD19}^+\text{CD3}^-\text{CD20}^{\text{lo}}\text{CD27}^{\text{high}}\text{CD38}^{\text{high}}$  cells.

**Generation of mAbs and Variable Gene Repertoire Analysis.** As detailed (1, 4, 5), VH and V $\kappa$  genes were PCR-amplified from the transcripts of single ASCs and then sequenced. These variable genes were then cloned into IgG1 or Igk expression vectors and cotransfected into the 293A cell line for expression. Variable genes were analyzed for identity and mutations using in-house analysis software and the IMGT search engine (6, 7). Background mutation rate by this method is  $\sim 1$  base exchange per 1,000 bases sequenced (based on sequences of constant region gene segments). Comparisons were made to published data (1, 8–10). Antibody sequences are deposited in the GenBank database.

**ELISA and HAI Assays.** Whole virus, recombinant HA, or vaccine-specific ELISA was performed as described (1). In brief, microtiter plates were coated with purified virus at 10  $\mu\text{g}/\text{mL}$ , 1:20 dilution of vaccine, or with 0.5  $\mu\text{g}/\text{mL}$  of recombinant HA protein. Goat anti-human IgG-HRP (Jackson ImmunoResearch Laboratories) was used to detect binding and developed using *o*-Phenylenediamine dihydrochloride substrate solution. Absorbencies were measured at OD490 on a microplate reader (Bio-Rad). Estimates of binding were calculated using area under the curve from eight dilutions of antibody (10–0.125  $\mu\text{g}/\text{mL}$ ) using GraphPad Prism. The HAI titers were determined as described (1). In brief, the serum or mAb samples were serially diluted with PBS in 96-well v-bottom plates and 4 HAU of live, egg-grown virus for 60 min before incubation with 0.5% turkey RBCs (Rockland Immunochemicals) for an additional 30 min. The serum titers or minimum effective concentrations were read based on the final dilution at which hemagglutination was inhibited. For competition ELISA, an additional preincubation with unlabeled competitor antibodies to the HA-stalk epitope at a 10-fold molar excess was then performed before application of the mAbs to the plate. Competitors consisted of one of two known stem-binding mAbs (70-1F02 or 70-5B03) or a negative control antibody specific for the HA globular head (EM-4C04) (11). Competition level was calculated as the percentage inhibition of the half-maximal binding concentration of test antibody relative to the absorbance without added competitor.

**Neutralization Assays.** For micronutralization assays, 100 TCID<sub>50</sub> of virus in 50  $\mu\text{L}$  of DMEM were incubated with 50  $\mu\text{L}$  of twofold-diluted antibodies (20–0.15625  $\mu\text{g}/\text{mL}$ ) at 37  $^{\circ}\text{C}$  for 1 h. Cells were washed and incubated in the media [supplemented with antibiotics, 0.5% BSA, and 0.5  $\mu\text{g}/\text{mL}$  tosyl phenylalanyl chloromethyl ketone (TPCK)-Trypsin] for 60 h. The MN titer was the concentration of mAbs that completely inhibited infection. Stem-binding antibodies were tested for neutralizing capacity using the PRNT<sub>50</sub> assay. PBS-washed Madin–Darby canine kidney (MDCK) cells were grown in six-well plates at a density of  $8 \times 10^5$  per well for 1 d then combined with 10-fold dilutions of virus in 500  $\mu\text{L}$  of DMEM at 37  $^{\circ}\text{C}$  for 1 h with mixing every 10 min. Cells were washed with PBS and overlaid with 199 media (supplemented with antibiotics, 0.2% BSA, and 0.5  $\mu\text{g}/\text{mL}$  TPCK-Trypsin) containing 0.5% agarose (Seakem), incubated for 36–40 h and fixed with 2% PFA for 10 min. Agarose plugs were removed, and cells were stained with 0.1% crystal violet in 25% EtOH for 1 min; then, the plates were dried and used to count plaques to calculate the virus titer by PFU. For the PRNT<sub>50</sub> assay, threefold-diluted mAbs (30–0.12  $\mu\text{g}/\text{mL}$ ) were combined with 100 PFU of virus in 250  $\mu\text{L}$  of DMEM and incubated at 37  $^{\circ}\text{C}$  for 1 h before the plaque assay as above. The concentration of antibodies that reduced plaques to <50 PFU were scored as the PRNT<sub>50</sub>.





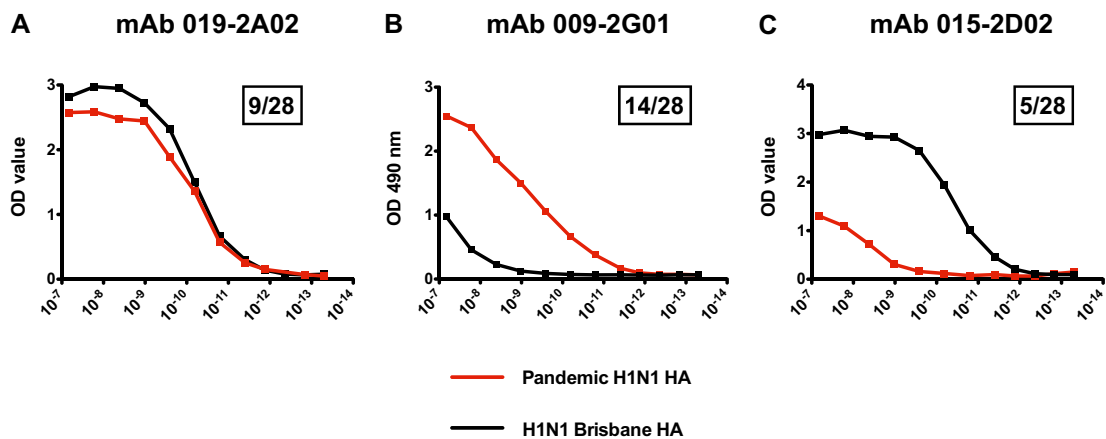

**Fig. 54.** Patterns of cross-reactivity among HA-specific vaccine-induced monoclonal antibodies. The 28 HA-specific monoclonal antibodies were analyzed by ELISA for their binding to HA proteins derived from either the pandemic H1N1 2009 or the Brisbane H1N1 [A/Brisbane/59/07 (H1N1)] influenza strains. The antibodies showed binding patterns that conformed to three distinct categories. (A) One category (9 of 28 antibodies) showed very similar binding to both HAs. (B and C) Another category (14 of 28 antibodies) showed better binding to the pandemic H1N1 HA, likely representing ongoing adaptation through affinity maturation (B), whereas the last category (5 of 28 antibodies) bound better to the Brisbane HA (C), consistent with OAS (original antigenic sin).

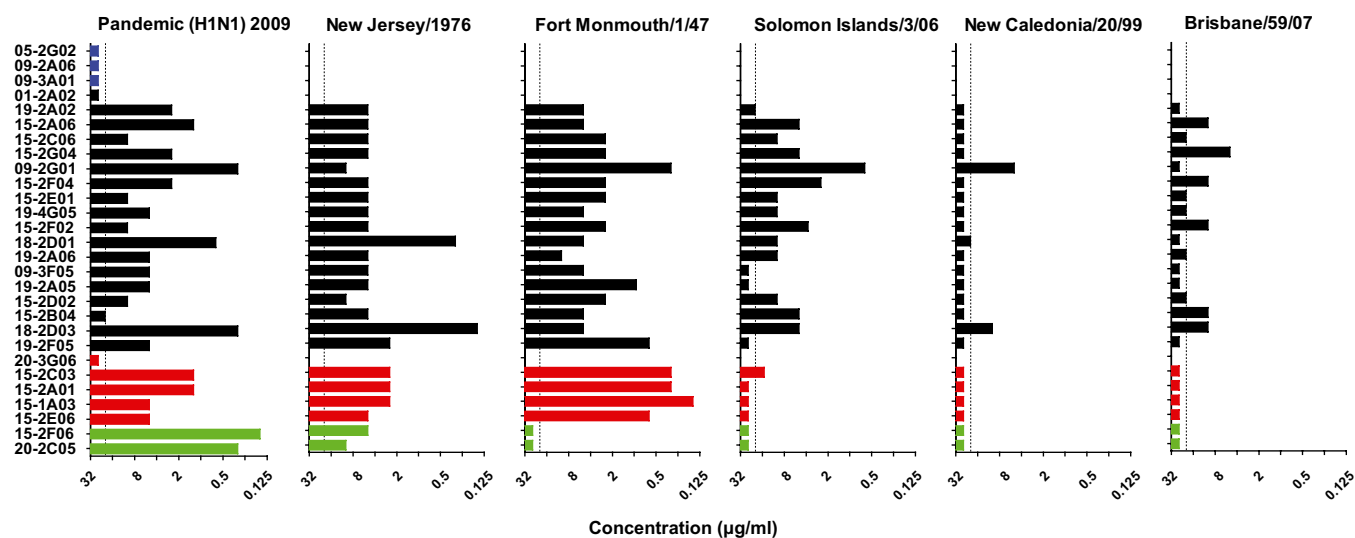

**Fig. 55.** Cross-reactivity of HA-specific monoclonal antibodies by HAI. Twenty-eight pandemic (H1N1) HA-binding mAbs were tested for HAI activity against a panel of H1N1 virus strains. Influenza strains are arranged in order of sequence similarity to the pandemic (H1N1) 2009, and mAbs are arranged according to cross-reactivity and degree of binding to pandemic (H1N1) 2009 HA. Dotted lines represent limits of detection. Data are representative of two to four repeat experiments.

**Table S1. Clinical characteristics of study and control groups**

| Vaccine                     | No. | Age, years (range) | Female, % | Interval between seasonal and pandemic H1N1 2009 vaccines, days (range) |
|-----------------------------|-----|--------------------|-----------|-------------------------------------------------------------------------|
| Pandemic H1N1 2009 vaccine* | 24  | 39.5 (26–64)       | 79.2      | 77 (4–160)                                                              |
| 2008/09 TIV                 | 31  | 31 (21–46)         | 67.7      | NA                                                                      |
| 2009/10 TIV                 | 27  | 29 (21–47)         | 74.1      | NA                                                                      |

Number of subjects, age, sex, and time interval between receiving pandemic (H1N1) 2009 vaccine and 2009/10 TIV are shown. Age and interval between vaccinations are expressed as median and range. NA, not applicable.

\*Pandemic H1N1 2009 influenza emerged well after the components of the seasonal vaccine had been confirmed. The monovalent vaccine was therefore administered after the seasonal vaccine. However, other than one subject who was later excluded from the plasmablast analysis, all vaccinees were given the pandemic vaccine at least 2 wk after the seasonal vaccine. Because plasmablasts generated in response to influenza vaccine disappear from the blood within 14 d, those induced by the seasonal influenza vaccine would not have directly contributed to the analysis. Furthermore, although the seasonal vaccine may have boosted memory B cells and influenced subsequent humoral responses, most subjects had also been vaccinated the previous year. Because the vaccine formulation was identical in the 2 years (A/Brisbane/59/2007 and A/Brisbane/10/2007), a substantial alteration in the memory B-cell repertoire would have been unlikely.

Table S2. Sequence, mutation, and V gene rearrangement data for pandemic (H1N1) 2009 virus-specific mAbs

| Name         | V gene            | V mutations | V %ID | J gene   | D gene      | CDR lengths | AA junction               |
|--------------|-------------------|-------------|-------|----------|-------------|-------------|---------------------------|
| SFV005-1C01H | IGHV1-69*01       | 24          | 92    | IGHJ4*02 | IGHD3-10*01 | 8.8.13      | CAGGSDDHAWGSFYW           |
| SFV005-1C01K | IGKV2or 2D-40*01  | 6           | 98    | IGKJ2*01 |             | 12.3.9      | CMQRIAFFPTF               |
| SFV005-1D06H | IGHV4-31*06       | 35          | 88    | IGHJ4*02 | IGHD6-19*01 | 10.7.16     | CARGLEGITVGAYYDFDW        |
| SFV005-1D06K | IGKV1-13*02       | 26          | 91    | IGKJ4*01 |             | 6.3.9       | CQQNFSPLTF                |
| SFV005-2G02H | IGHV1-18*01       | 22          | 92    | IGHJ4*02 | IGHD3-9*01  | 8.8.15      | CARDRRLLTGLSLGDYW         |
| SFV005-2G02K | IGKV2 or 2D-30*01 | 13          | 96    | IGKJ2*01 |             | 11.3.9      | CMQGTYPWPTF               |
| SFV009-2A04H | IGHV1-69*06       | 36          | 88    | IGHJ1*01 | IGHD5-18*01 | 8.8.13      | CASPAYNSGFFALLHW          |
| SFV009-2A04K | IGKV4-1*01        | 7           | 98    | IGKJ2*01 |             | 12.3.10     | CQQYYSNSMYTF              |
| SFV009-2A06H | IGHV1-69*06       | 20          | 93    | IGHJ4*02 | IGHD3-22*01 | 8.8.18      | CASPDLTMTVFPHTGPLDFW      |
| SFV009-2A06K | IGKV1-5*03        | 17          | 94    | IGKJ1*01 |             | 6.3.9       | CQHYDTYSGTF               |
| SFV009-2G01H | IGHV4-59*03       | 15          | 95    | IGHJ6*03 | IGHD5-12*01 | 8.7.19      | CARDCSGFEDMDSFYFMDVW      |
| SFV009-2G01K | IGKV3-11*01       | 17          | 94    | IGKJ4*01 |             | 6.3.11      | CQYRSHWPPAVTF             |
| SFV009-3A01H | IGHV4-39*06       | 13          | 96    | IGHJ4*02 | IGHD2-8*01  | 10.7.19     | CARQLTGMVYAILPSYDFDW      |
| SFV009-3A01K | IGKV1-5*03        | 6           | 98    | IGKJ1*01 |             | 6.3.9       | CQQHNSYSGAF               |
| SFV009-3A02H | IGHV3-23*01       | 20          | 93    | IGHJ3*02 | IGHD3-3*01  | 8.8.15      | CAKDRILPYDTDAFDIW         |
| SFV009-3A02K | IGKV1-5*03        | 25          | 91    | IGKJ3*01 |             | 6.3.10      | CQEYHTSSRVTF              |
| SFV009-3D04H | IGHV3-23*01       | 21          | 93    | IGHJ4*02 | IGHD6-6*01  | 8.8.16      | CAKDRVVGRPWWEYSLDFW       |
| SFV009-3D04K | IGKV3-15*01       | 16          | 94    | IGKJ4*01 |             | 6.3.10      | CQQYNNWPPLTF              |
| SFV009-3E06H | IGHV3-66*01       | 12          | 96    | IGHJ4*02 | IGHD4-11*01 | 8.7.11      | CASRHYNYDDDDYG            |
| SFV009-3E06K | IGKV2-30*02       | 2           | 99    | IGKJ5*01 |             | 11.3.8      | CMQGTHWPTF                |
| SFV009-3F05H | IGHV3-7*01        | 22          | 92    | IGHJ5*02 | IGHD3-10*01 | 8.8.18      | CARAGSYGDRPINNWFDPW       |
| SFV009-3F05K | IGKV1-5*03        | 23          | 92    | IGKJ2*01 |             | 6.3.9       | CQHYSNYSYTF               |
| SFV009-3G01H | IGHV3-30*04       | 13          | 95    | IGHJ4*02 | IGHD3-16*01 | 8.8.15      | CARDPSNPPHWGNFDSW         |
| SFV009-3G01K | IGKV3-11*01       | 8           | 97    | IGKJ5*01 |             | 6.3.10      | CQQRSNWPPITF              |
| SFV009-3G03H | IGHV3-23*01       | 16          | 94    | IGHJ4*02 | IGHD4-17*01 | 8.8.16      | CAKDLAVTPPAQGYLDRW        |
| SFV009-3G03K | IGKV3-11*01       | 5           | 98    | IGKJ5*01 |             | 6.3.10      | CQQRSNWPPITF              |
| SFV014-2A04H | IGHV4-61*02       | 8           | 97    | IGHJ5*02 | IGHD4-23*01 | 10.7.17     | CARGIKGDYGGGANWFDPW       |
| SFV014-2A04K | IGKV3-15*01       | 2           | 100   | IGKJ2*01 |             | 6.3.10      | CQQYNNWPPYTF              |
| SFV014-2B03H | IGHV4-61*02       | 11          | 96    | IGHJ5*02 | IGHD3-16*02 | 10.7.14     | CARARFFGISNWDFPW          |
| SFV014-2B03K | IGKV1 or 1D-39*01 | 5           | 99    | IGKJ1*01 |             | 6.3.9       | CQQSYSAPLTF               |
| SFV014-2B06H | IGHV1-69*01       | 17          | 94    | IGHJ4*02 | IGHD3-10*01 | 8.8.15      | CARVGGALIRSSGSDYW         |
| SFV014-2B06K | IGKV1D-17*02      | 2           | 99    | IGKJ4*01 |             | 6.3.9       | CLQHNSYPLTF               |
| SFV015-1A01H | IGHV1-69*04       | 26          | 91    | IGHJ6*03 | IGHD6-19*01 | 8.8.17      | CARDDYMTVDRDYYMDVW        |
| SFV015-1A01K | IGKV3-15*01       | 11          | 96    | IGKJ3*01 |             | 6.3.11      | CQQYNNWPPPLFSF            |
| SFV015-1A03H | IGHV3-7*01        | 27          | 91    | IGHJ6*03 | IGHD5-24*01 | 8.8.22      | CARVSREEWATVDDPHDYYMDVW   |
| SFV015-1A03K | IGKV1 or 1D-39*01 | 24          | 92    | IGKJ4*01 |             | 6.3.9       | CQQYNPLPTF                |
| SFV015-1A04H | IGHV3-7*01        | 32          | 89    | IGHJ6*03 | IGHD5-24*01 | 8.8.22      | CVRVSREEWATVDDPHDYYMDVW   |
| SFV015-1A04K | IGKV1 or 1D-39*01 | 26          | 91    | IGKJ4*01 |             | 6.3.9       | CQQSYNSLFTF               |
| SFV015-2A01H | IGHV3-7*01        | 19          | 93    | IGHJ6*03 | IGHD5-24*01 | 8.8.22      | CARVSREEWATVDDPHDYYMDVW   |
| SFV015-2A01K | IGKV1 or 1D-39*01 | 24          | 91    | IGKJ4*01 |             | 6.3.9       | CQQSYNRLFTF               |
| SFV015-2A06H | IGHV1-2*02        | 21          | 93    | IGHJ3*02 | IGHD4-17*01 | 8.8.16      | CARDFDYGDYRGSADFIDW       |
| SFV015-2A06K | IGKV1 or 1D-33*01 | 13          | 94    | IGKJ3*01 |             | 6.3.5       | CQQLNTF                   |
| SFV015-2B04H | IGHV1-2*02        | 39          | 87    | IGHJ3*02 | IGHD4-17*01 | 8.8.17      | CARDIDTGDYRGADVLMW        |
| SFV015-2B04K | IGKV1 or 1D-33*01 | 24          | 90    | IGKJ3*01 |             | 6.3.5       | CQQLYTF                   |
| SFV015-2C03H | IGHV3-7*01        | 22          | 92    | IGHJ6*03 | IGHD5-24*01 | 8.8.22      | CARVSREEWATVDDPHDYYMDVW   |
| SFV015-2C03K | IGKV1 or 1D-39*01 | 19          | 93    | IGKJ4*01 |             | 6.3.9       | CQQSYITLFTF               |
| SFV015-2C04H | IGHV3-23*01       | 21          | 93    | IGHJ4*02 | IGHD5-24*01 | 8.8.19      | CAREEFTDTEMTITQGDFGYW     |
| SFV015-2C04K | IGKV1 or 1D-39*01 | 15          | 95    | IGKJ3*01 |             | 6.3.9       | CQRSYITPFTF               |
| SFV015-2C06H | IGHV1-2*02        | 34          | 88    | IGHJ3*02 | IGHD4-17*01 | 8.8.17      | CARDIDSGDYRAADVFIQIW      |
| SFV015-2C06K | IGKV1 or 1D-33*01 | 10          | 95    | IGKJ3*01 |             | 6.3.5       | CQQLTTF                   |
| SFV015-2D02H | IGHV1-2*02        | 35          | 88    | IGHJ3*02 | IGHD4-17*01 | 8.8.17      | CARDIDSGDYRAADVFIQIW      |
| SFV015-2D02K | IGKV1 or 1D-33*01 | 8           | 96    | IGKJ3*01 |             | 6.3.5       | CQQLATF                   |
| SFV015-2E01H | IGHV1-2*02        | 33          | 89    | IGHJ3*02 | IGHD4-17*01 | 8.8.17      | CARDIDSGDYRAADVFIQIW      |
| SFV015-2E01K | IGKV1 or 1D-33*01 | 10          | 95    | IGKJ3*01 |             | 6.3.5       | CQQLTTF                   |
| SFV015-2E06H | IGHV3-7*01        | 20          | 93    | IGHJ6*03 | IGHD5-24*01 | 8.8.22      | CARVSREEWATVDDPHDYYMDVW   |
| SFV015-2E06K | IGKV1 or 1D-39*01 | 24          | 92    | IGKJ4*01 |             | 6.3.9       | CQQSYNSLFTF               |
| SFV015-2F01H | IGHV1-18*01       | 14          | 95    | IGHJ6*03 | IGHD3-16*02 | 8.8.24      | CAREGYDHLWGTYRFEAIDYYTDVW |
| SFV015-2F01K | IGKV3-20*01       | 10          | 96    | IGKJ1*01 |             | 7.3.9       | CHQYGSSTGTF               |
| SFV015-2F02H | IGHV1-2*02        | 42          | 86    | IGHJ3*02 | IGHD4-17*01 | 8.8.17      | CARDIDFGDYRAADVFIHW       |
| SFV015-2F02K | IGKV1 or 1D-33*01 | 22          | 91    | IGKJ3*01 |             | 6.3.5       | CQQLDTF                   |
| SFV015-2F03H | IGHV4-b*02        | 9           | 97    | IGHJ4*02 | IGHD5-12*01 | 9.7.13      | CARYIVSTINIFYDDW          |
| SFV015-2F03K | IGKV3-20*01       | 8           | 97    | IGKJ3*01 |             | 7.3.10      | CQLYGGSPPLFAF             |
| SFV015-2F04H | IGHV1-2*02        | 19          | 93    | IGHJ3*02 | IGHD4-17*01 | 8.8.16      | CARDFDYGDYRGSADFIDW       |
| SFV015-2F04K | IGKV1 or 1D-33*01 | 23          | 90    | IGKJ3*01 |             | 6.3.5       | CQQLNTF                   |
| SFV015-2F06H | IGHV3-23*01       | 28          | 91    | IGHJ4*03 | IGHD5-24*01 | 8.8.19      | CAREEFTDTEMTINQGDFAYW     |
| SFV015-2F06K | IGKV1 or 1D-39*01 | 18          | 94    | IGKJ3*01 |             | 6.3.9       | CQRSFITPFTF               |
